# Supplementary material for: Synthesis and Biological Evaluation of Novel 99mTc(CO)3-Labeled Thymidine Analogs as Potential Probes for Tumor Proliferation Imaging
Source: MDPI journal article supplement (doi:10.3390/molecules21040510), 2016-04-19
Supplement: s1 [file s1]

# Supplementary Materials: Synthesis and Biological Evaluation of Novel $^{99m}\text{Tc}(\text{CO})_3$ -Labeled Thymidine Analogs as Potential Probes for Tumor Proliferation Imaging

Xiaojiang Duan, Teli Liu, Yichun Zhang and Junbo Zhang

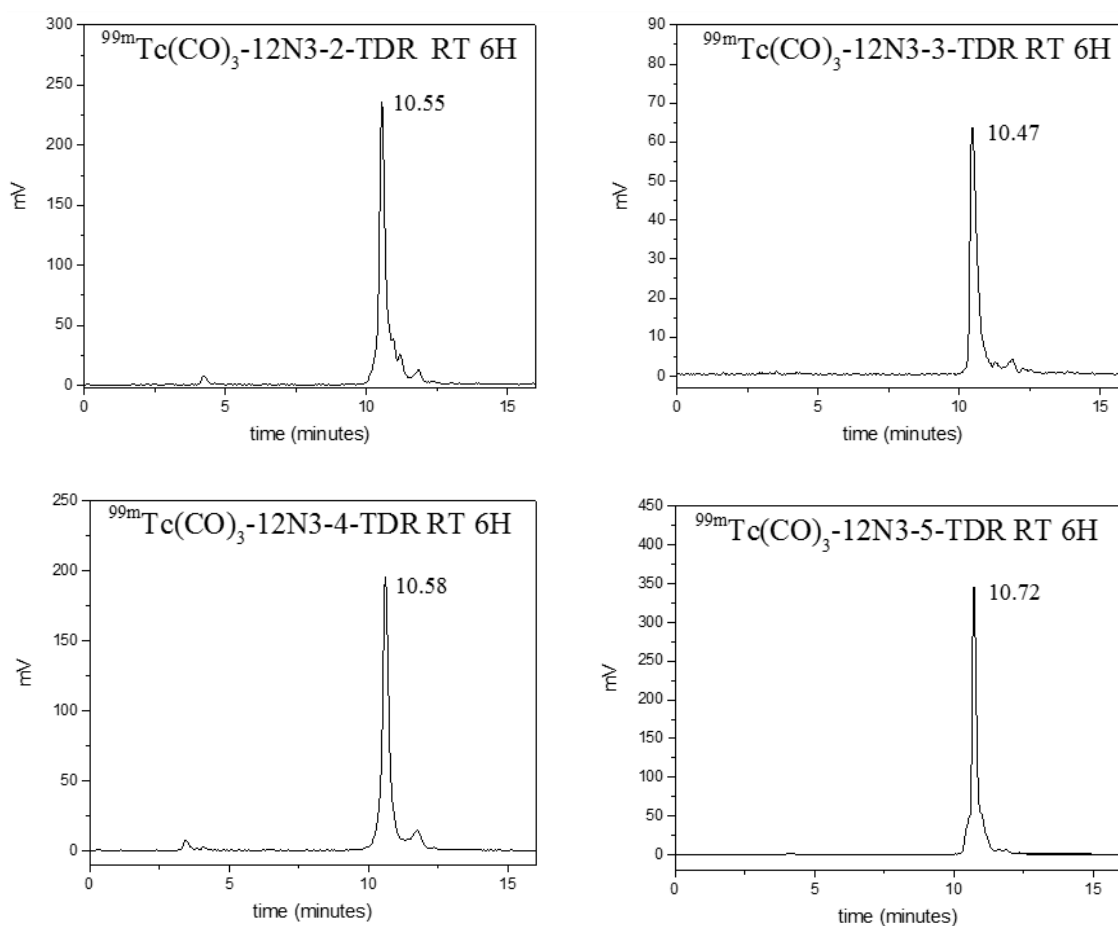

Figure S1. HPLC chromatograms of **7a**, **7b**, **7c** and **7d** at room temperature for 6 h.

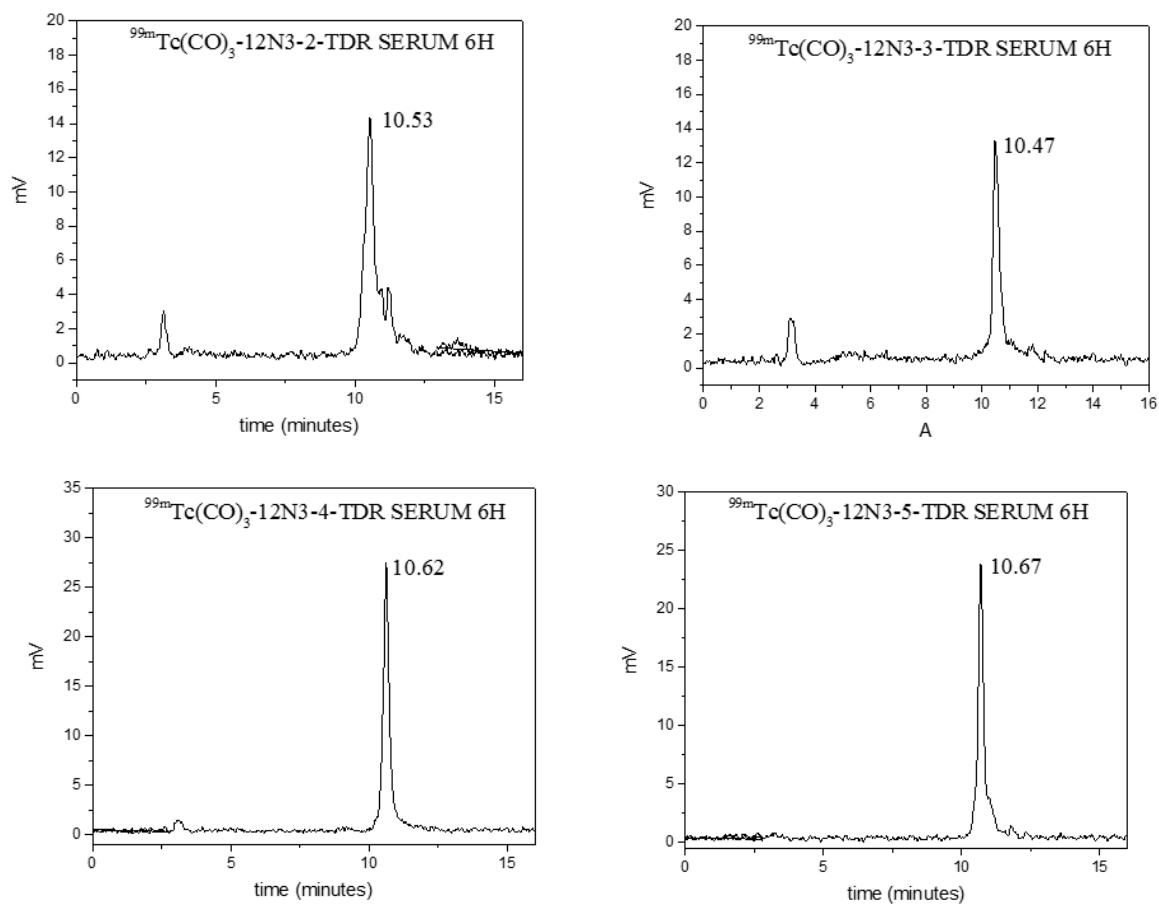

**Figure S2.** HPLC chromatograms of **7a**, **7b**, **7c** and **7d** in mouse serum at 37 °C for 6 h.
